# Supplementary material for: Controllable modification of the In δ + –O v interface on In 2 O 3 for efficient carbon dioxide hydrogenation to methanol
Source: Royal Society of Chemistry journal article supplement (doi:10.1039/d4nj04786a), 2025-01-01
Supplement: d4nj04786a1.pdf [file d4nj04786a1.pdf]

## **Controllable modification of the $\text{In}^{\delta+}\text{-O}_v$ interface on $\text{In}_2\text{O}_3$ for efficient carbon dioxide hydrogenation to methanol**

Ying Wang, Xinyu Ma, Bo Cheng, Jiandong Ling, Yushuang Hu, Shijian Zhou\*, Yan Kong\*

State Key Laboratory of Materials-Oriented Chemical Engineering, College of Chemical Engineering, Nanjing Tech University, Nanjing 210009, China.

Shijian Zhou:

E-mail: [zshijian@njtech.edu.cn](mailto:zshijian@njtech.edu.cn).

Yan Kong:

E-mail: [kongy36@njtech.edu.cn](mailto:kongy36@njtech.edu.cn).

The specific surface area of the catalyst was calculated by N<sub>2</sub> adsorption and desorption characterization (Fig. S1) and BET equation. The specific surface area of CP-In<sub>2</sub>O<sub>3</sub>-N<sub>2</sub> is calculated to be 95.5 m<sup>2</sup>g<sup>-1</sup>, which is slightly larger than that of H-In<sub>2</sub>O<sub>3</sub>-O<sub>2</sub> and H-In<sub>2</sub>O<sub>3</sub>-N<sub>2</sub> prepared by the hydrothermal method. The C-In<sub>2</sub>O<sub>3</sub>-N<sub>2</sub> sample has a specific surface area of only 24.7 m<sup>2</sup>g<sup>-1</sup>. The data are presented in Table S1.

Table S1 shows that all catalysts show a small increase in grain size after high temperature and pressure reaction due to the occurrence of different degrees of agglomeration of In<sub>2</sub>O<sub>3</sub>. Meanwhile, the catalyst grain sizes after all four reactions are in the range of 16-23 nm. In particular, the grain sizes of CP-In<sub>2</sub>O<sub>3</sub>-N<sub>2</sub>, H-In<sub>2</sub>O<sub>3</sub>-O<sub>2</sub> and H-In<sub>2</sub>O<sub>3</sub>-N<sub>2</sub> are smaller. It is shown that In<sub>2</sub>O<sub>3</sub> is very stable at high temperatures and has good sintering resistance.

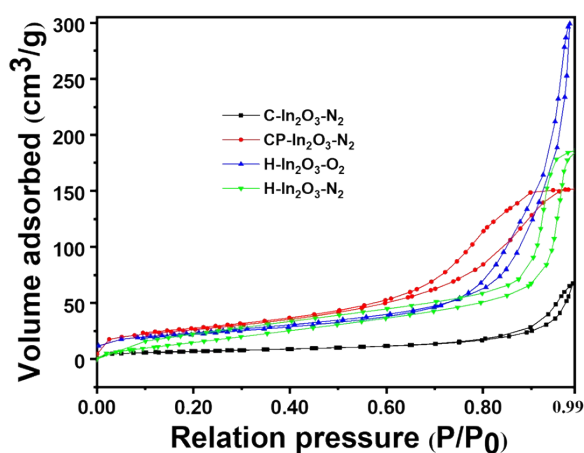

Fig. S1 Nitrogen adsorption–desorption isotherm of different In<sub>2</sub>O<sub>3</sub> catalysts.

Table S1 Basic structure property of catalysts.

| Sample                                            | BET surface area<br>(m <sup>2</sup> /g) [a] | In <sub>2</sub> O <sub>3</sub> crystal size (nm) [b] |      |
|---------------------------------------------------|---------------------------------------------|------------------------------------------------------|------|
|                                                   |                                             | fresh                                                | used |
| C-In <sub>2</sub> O <sub>3</sub> -N <sub>2</sub>  | 24.7                                        | 17.0                                                 | 22.3 |
| CP-In <sub>2</sub> O <sub>3</sub> -N <sub>2</sub> | 95.5                                        | 9.0                                                  | 17.2 |
| H-In <sub>2</sub> O <sub>3</sub> -O <sub>2</sub>  | 83.6                                        | 10.3                                                 | 16.7 |
| H-In <sub>2</sub> O <sub>3</sub> -N <sub>2</sub>  | 76.1                                        | 9.5                                                  | 18.4 |

[a] BET specific surface area was obtained by N<sub>2</sub> adsorption-desorption tests.

[b] Calculated from XRD data using the Scherrer equation.

The morphology and structure of the sample after reaction are analyzed using field emission scanning electron microscopy (FE-SEM) and high-resolution projection electron microscopy (HRTEM). The experimental results are shown in Fig. S2. From the SEM images (Fig. S2(a-b)), it can be seen that the morphology of CP-In<sub>2</sub>O<sub>3</sub>-N<sub>2</sub> and H-In<sub>2</sub>O<sub>3</sub>-N<sub>2</sub> are similar, with fluffy and stacked nanoparticle structures. The HRTEM images (Fig. S2(c-d)) show an average particle size of about 20.0 nm for both samples, which is consistent with the grain size calculated by the Scherrer's formula above. Moreover, the stripe spacing  $d=0.253$  and  $0.293$  nm correspond to the (400) and (222) crystal faces of cubic phase In<sub>2</sub>O<sub>3</sub>, respectively. It should be noted that some amorphous In<sub>2</sub>O<sub>3-x</sub> components can be clearly found in the middle and edges of the sample in the HRTEM image. This is due to the continuous between the crystalline and amorphous states as the reaction time increases. The formation of molten In<sup>0</sup> species gradually occupy the surface. In addition, TSoukalou et al.<sup>1</sup> reported that the molten In<sup>0</sup> species are highly correlated with the formation of oxygen vacancies on the catalyst surface.

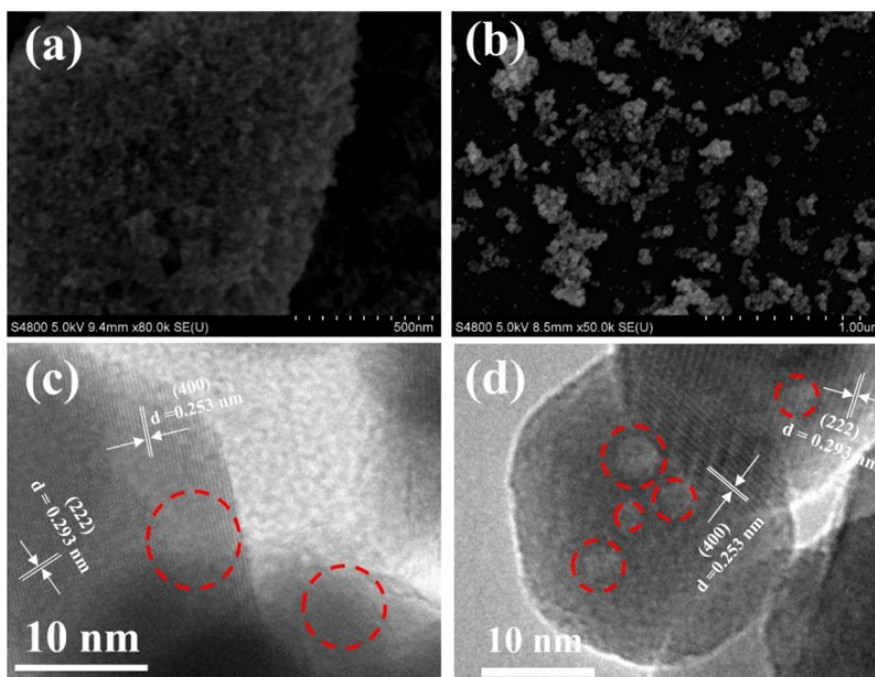

**Fig. S2** (a) SEM image of CP-In<sub>2</sub>O<sub>3</sub>-N<sub>2</sub>, (b) SEM image of H-In<sub>2</sub>O<sub>3</sub>-N<sub>2</sub>, (c) HRTEM image of CP-In<sub>2</sub>O<sub>3</sub>-N<sub>2</sub>, (d) HRTEM image of H-In<sub>2</sub>O<sub>3</sub>-N<sub>2</sub>.

1. A. Tsoukalou, P. M. Abdala, D. Stoian, X. Huang, M.-G. Willinger, A. Fedorov and C. R. Mueller, *Journal of the American Chemical Society*, 2019, **141**, 13497-13505.
